# Supplementary material
Source: PubMed Central journal article supplement (PMC4644643)
Supplement: AEM.02690-15_zam999116784so1.pdf [file AEM.02690-15_zam999116784so1.pdf]

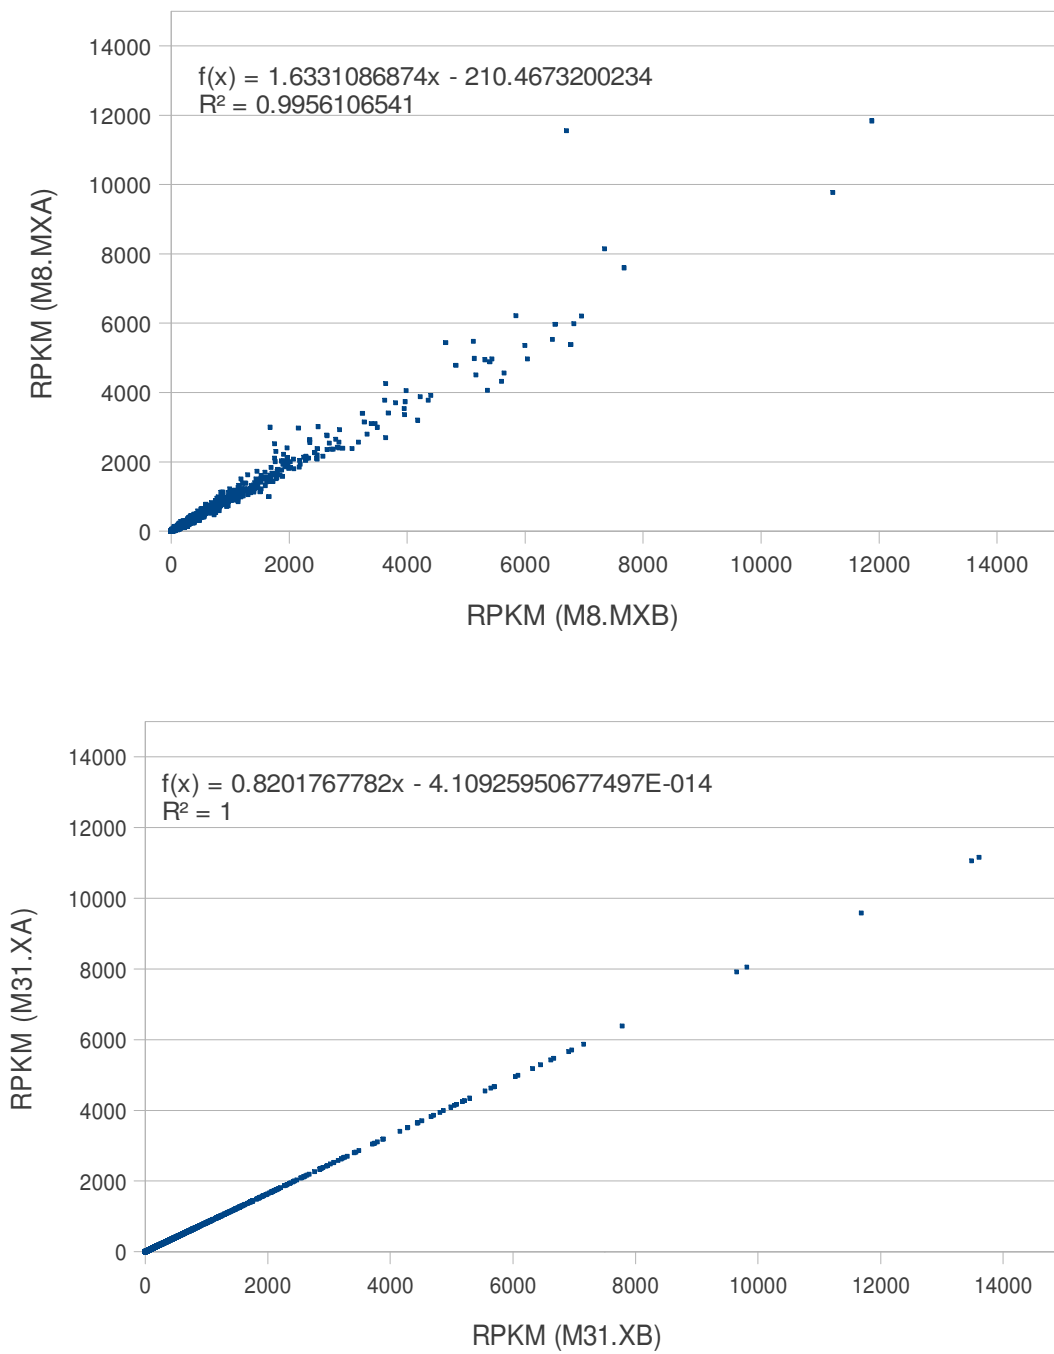

**Figure S1.** Reproducibility between the biological replicates (MXA and MXB) for mixed cultures. Correlations for RPKM values were plotted once assigned to M8 (upper panel), with a  $R = 0.9956$ , or M31 (lower panel) with  $R = 1$ .

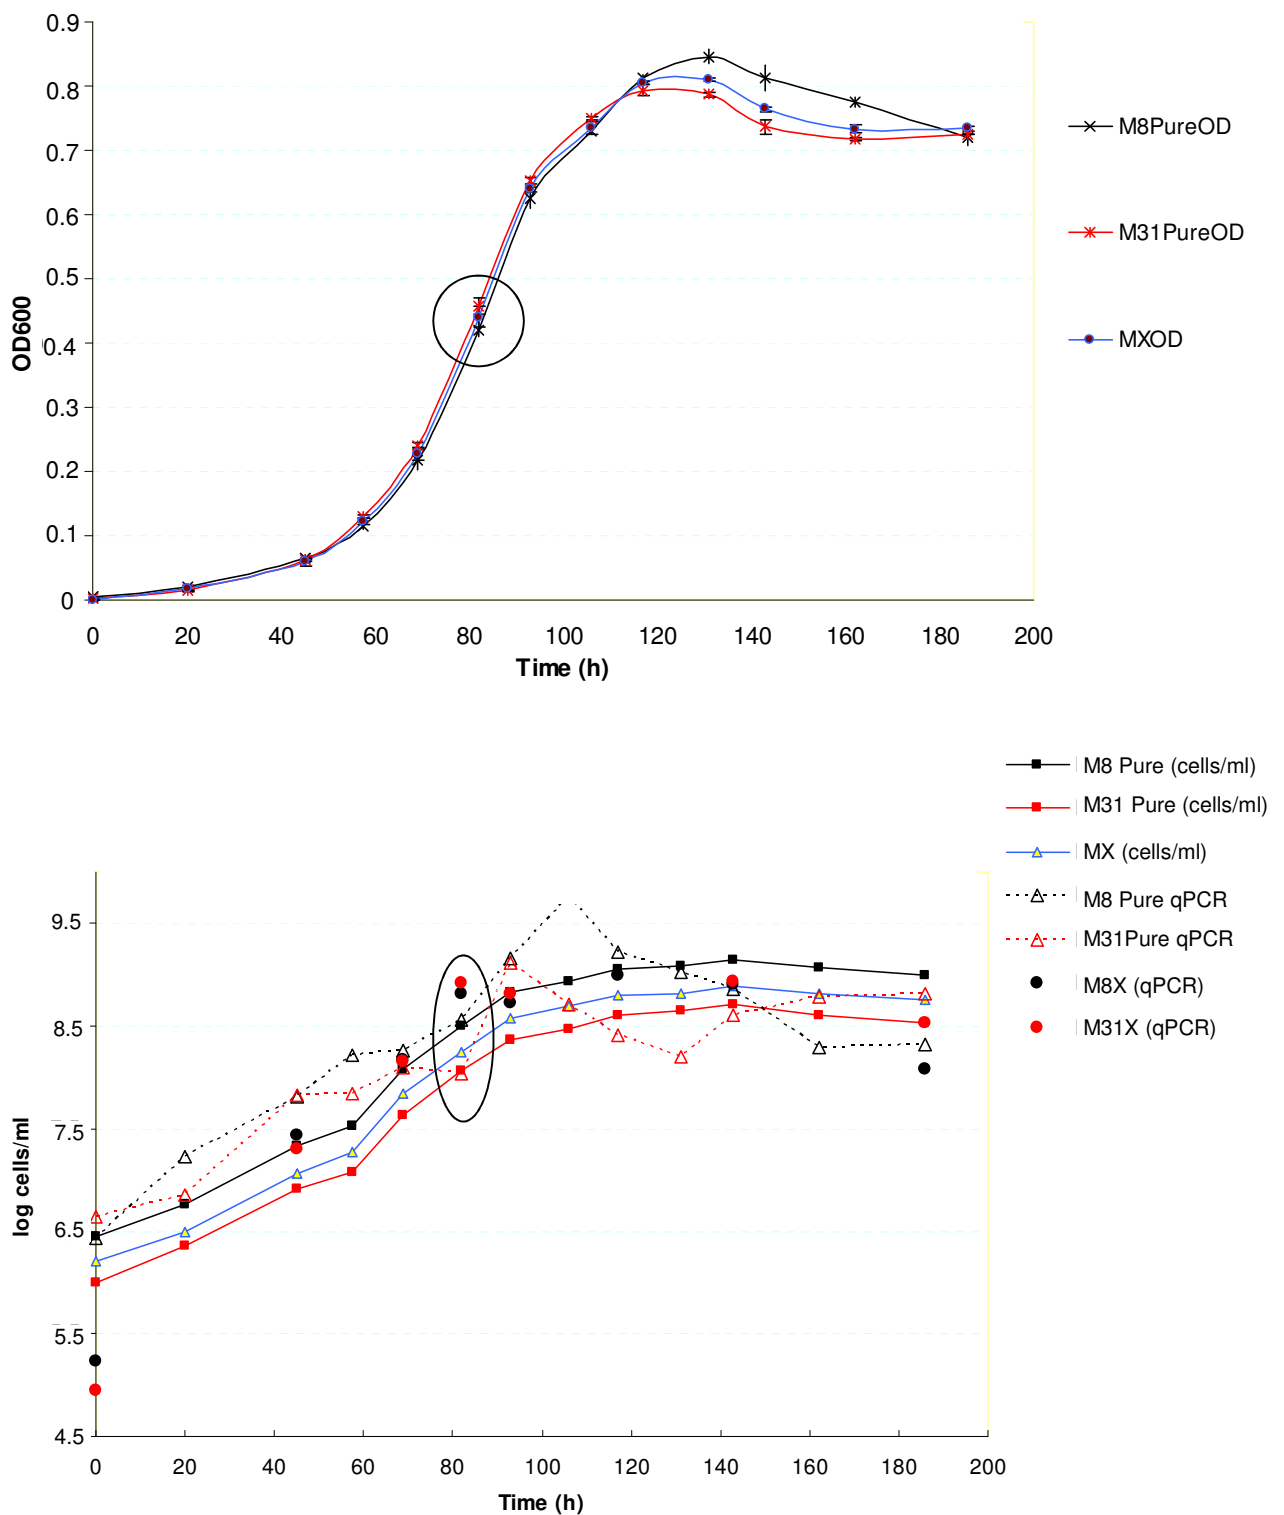

**Figure S2.** Growth curves for pure cultures of M8 (blue) and M31 (red). In the upper figure lines represent OD reads for pure and mixed cultures, as indicated in the insert. The bottom figure show log cells/ml values for M8 and M31 cultures measured by quantitative PCR (black and red dots for mixed and triangles for pure cultures) and DAPI (continuous lines). Circled the point selected for sequencing.

Cumulative frequency curve. *S. ruber* M8, pure cultures

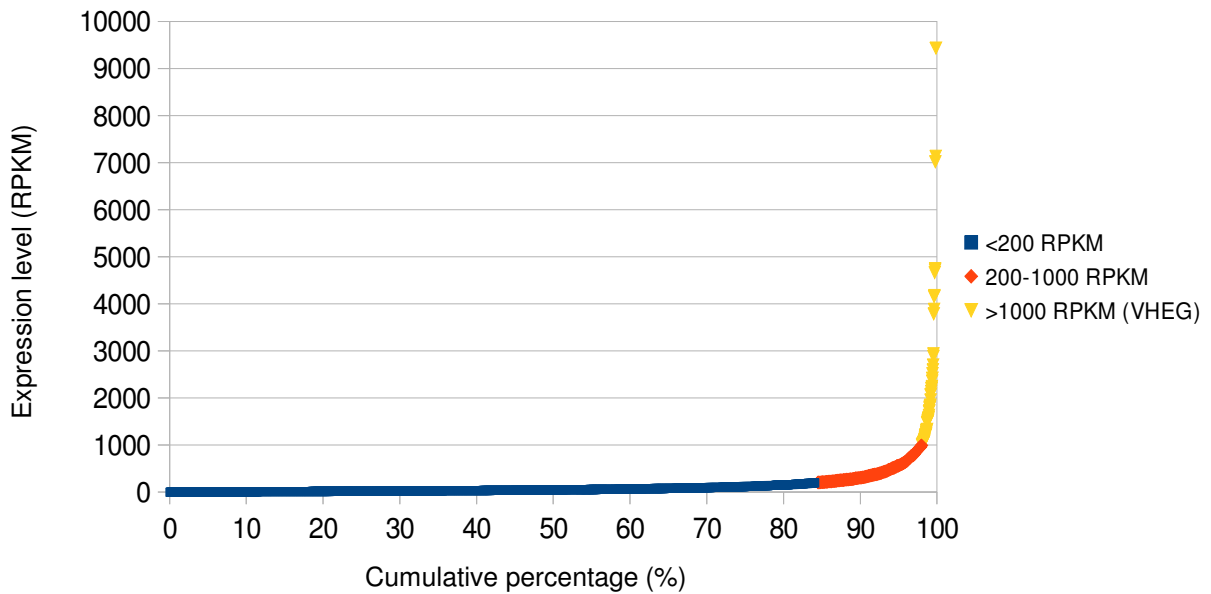

Cumulative frequency curve. *S. ruber* M31, pure cultures

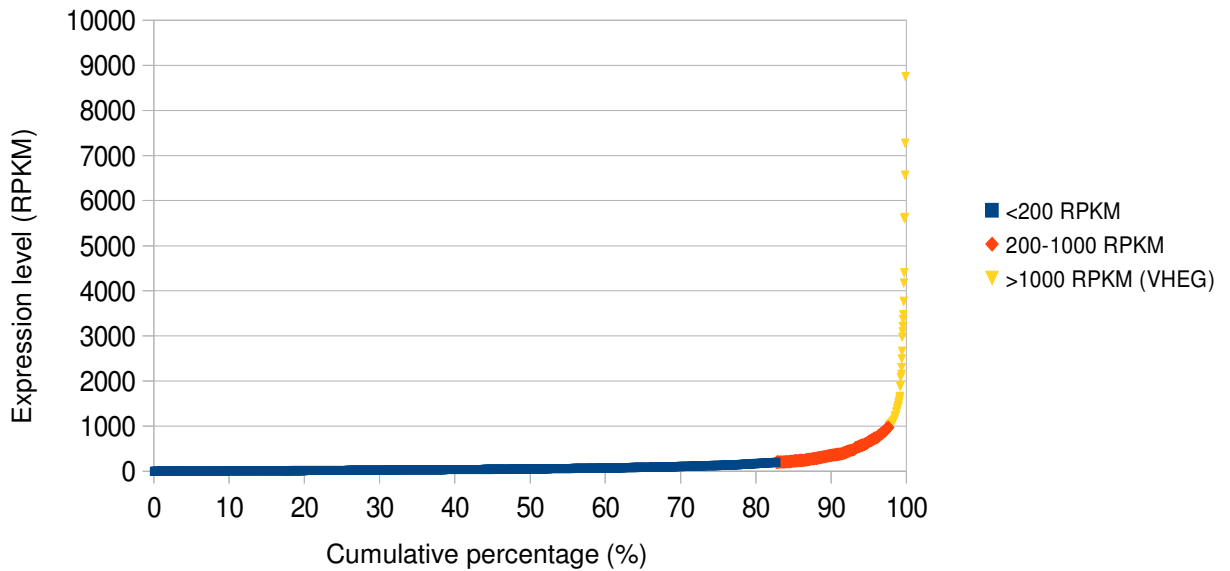

**Figure S3.** RPKM transcription levels for M8 (upper panel) and M31 (lower panel) genes in pure cultures. Cumulative curves represents the percentage of genes with transcription levels between 0-200 RPKM (blue), 200-1000 RPKM (orange) and above 1000 RPKM (yellow).

*S. ruber* M31 replicons. Normalized expression frequency histogram

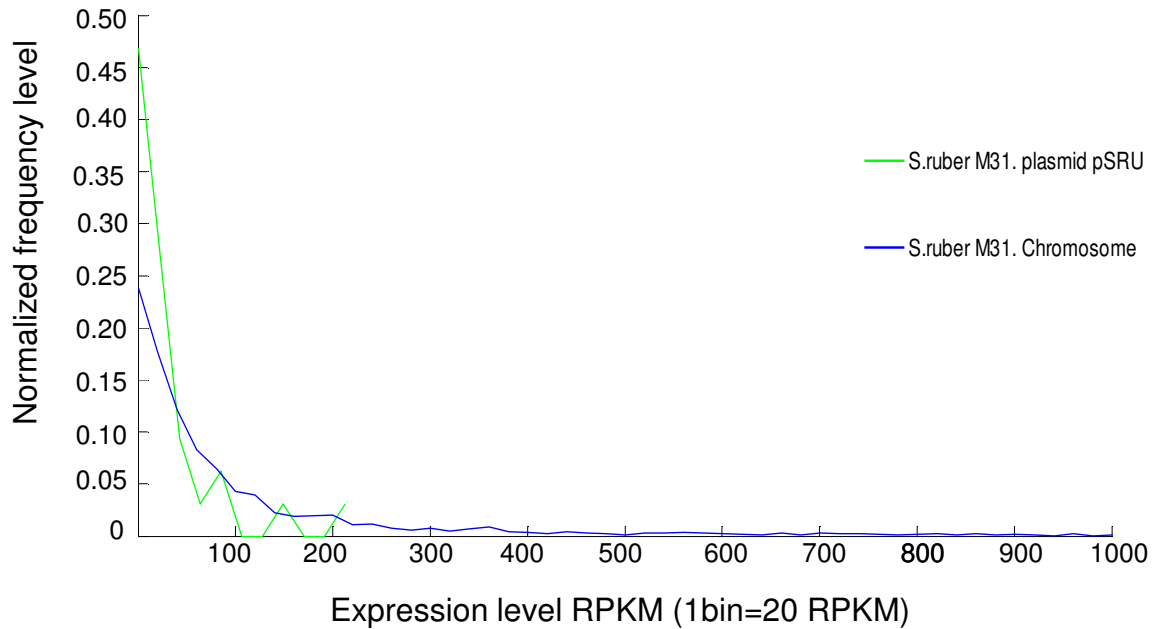

*S. ruber* M8 replicons. Normalized expression frequency histogram

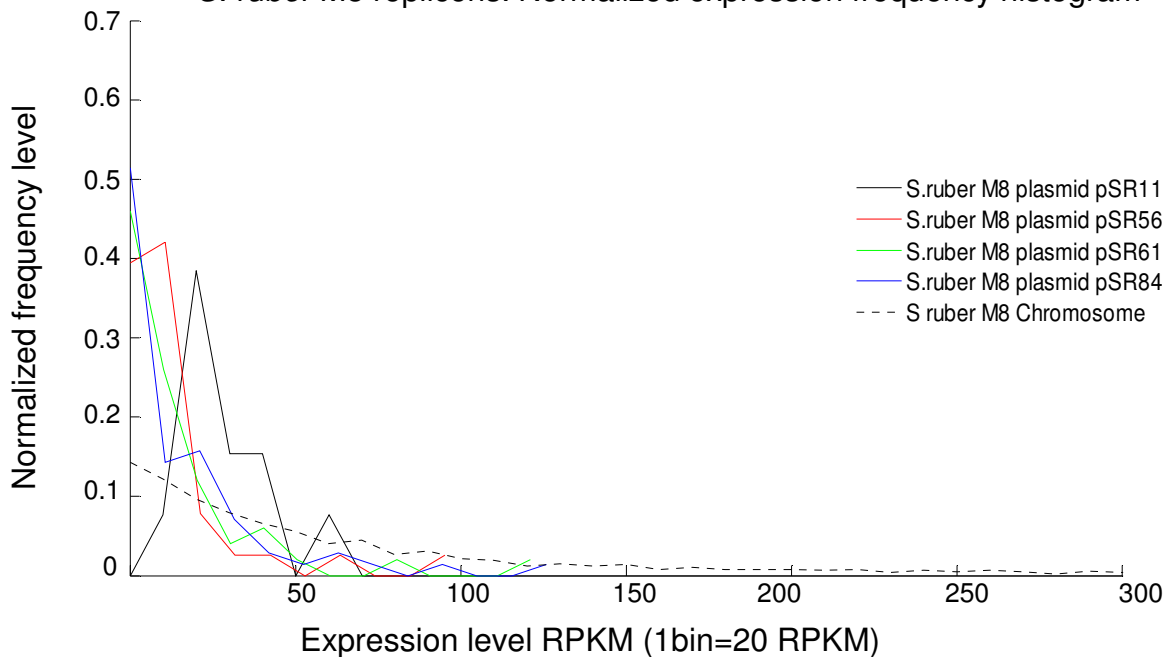

**Figure S4.** Normalized gene distribution for M31 (upper figure) and M8 (bottom figure) based on their expression level (RPKM). All the replicons were represented in both cases.

M8 Pure culture. Relation between %GC and expression values

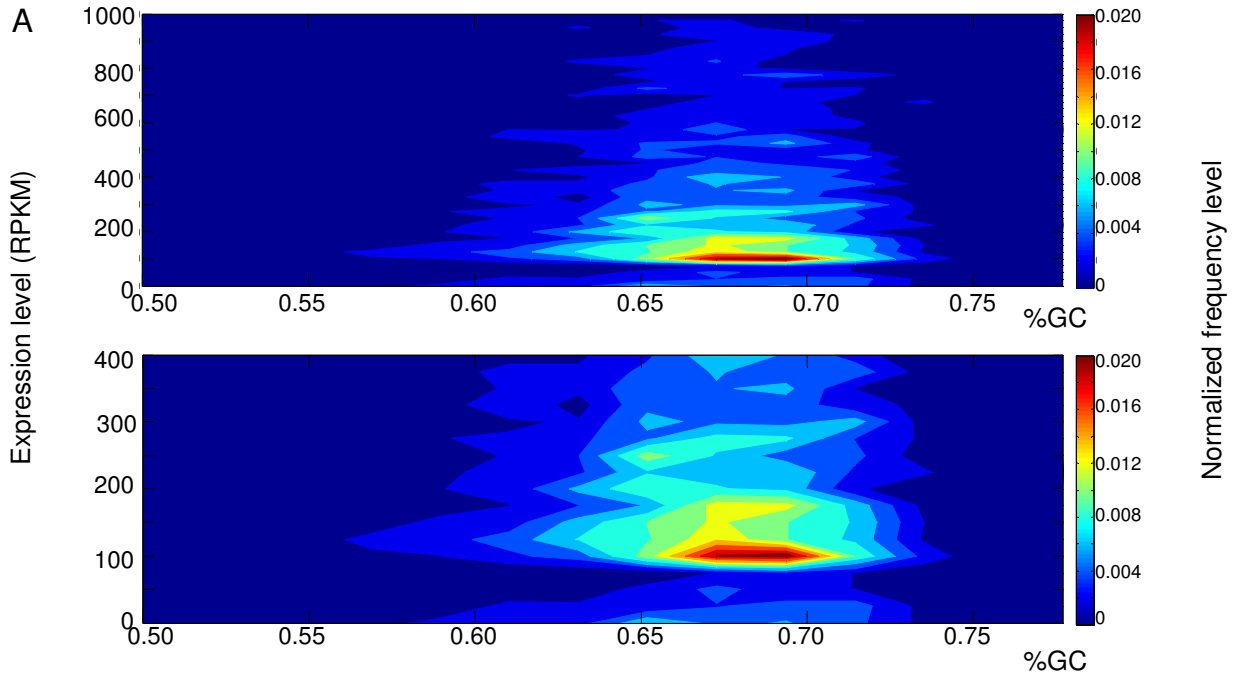

M31 Pure culture. Relation between %GC and expression values

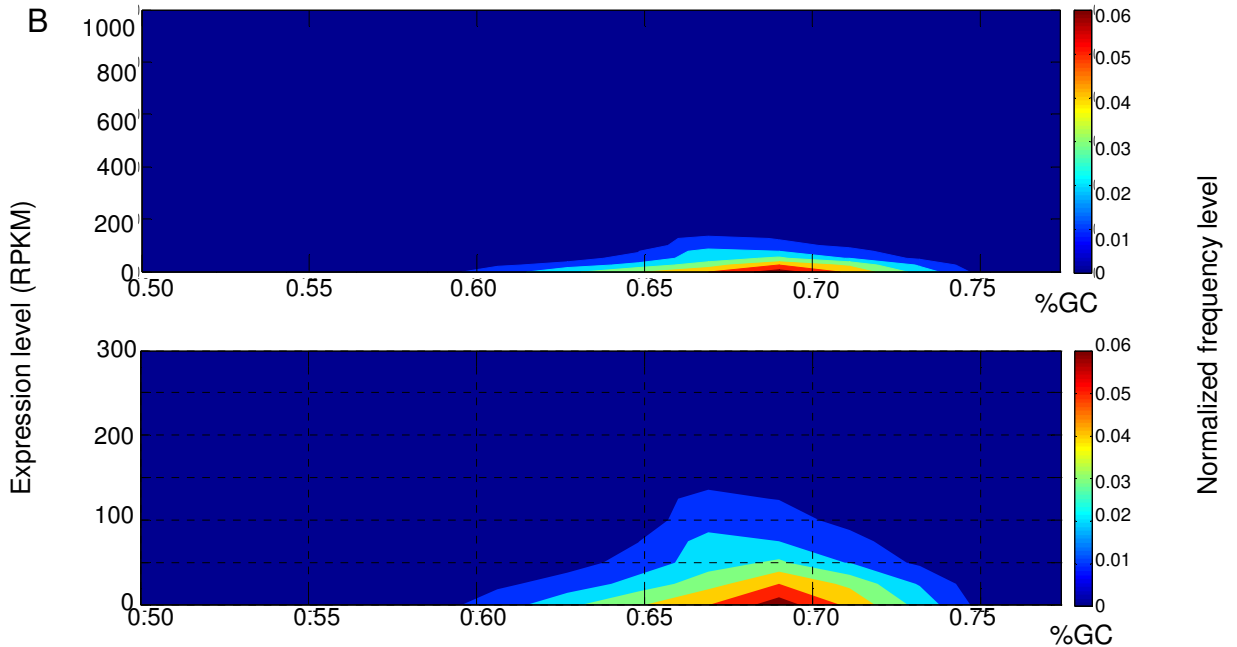

**Figure S5.** Normalized gene distribution for M8 (A) and M31 (B) based on their % GC and RPKM expression levels. For each strain, genes with expression values below 300 RPKM are shown in bottom panels.

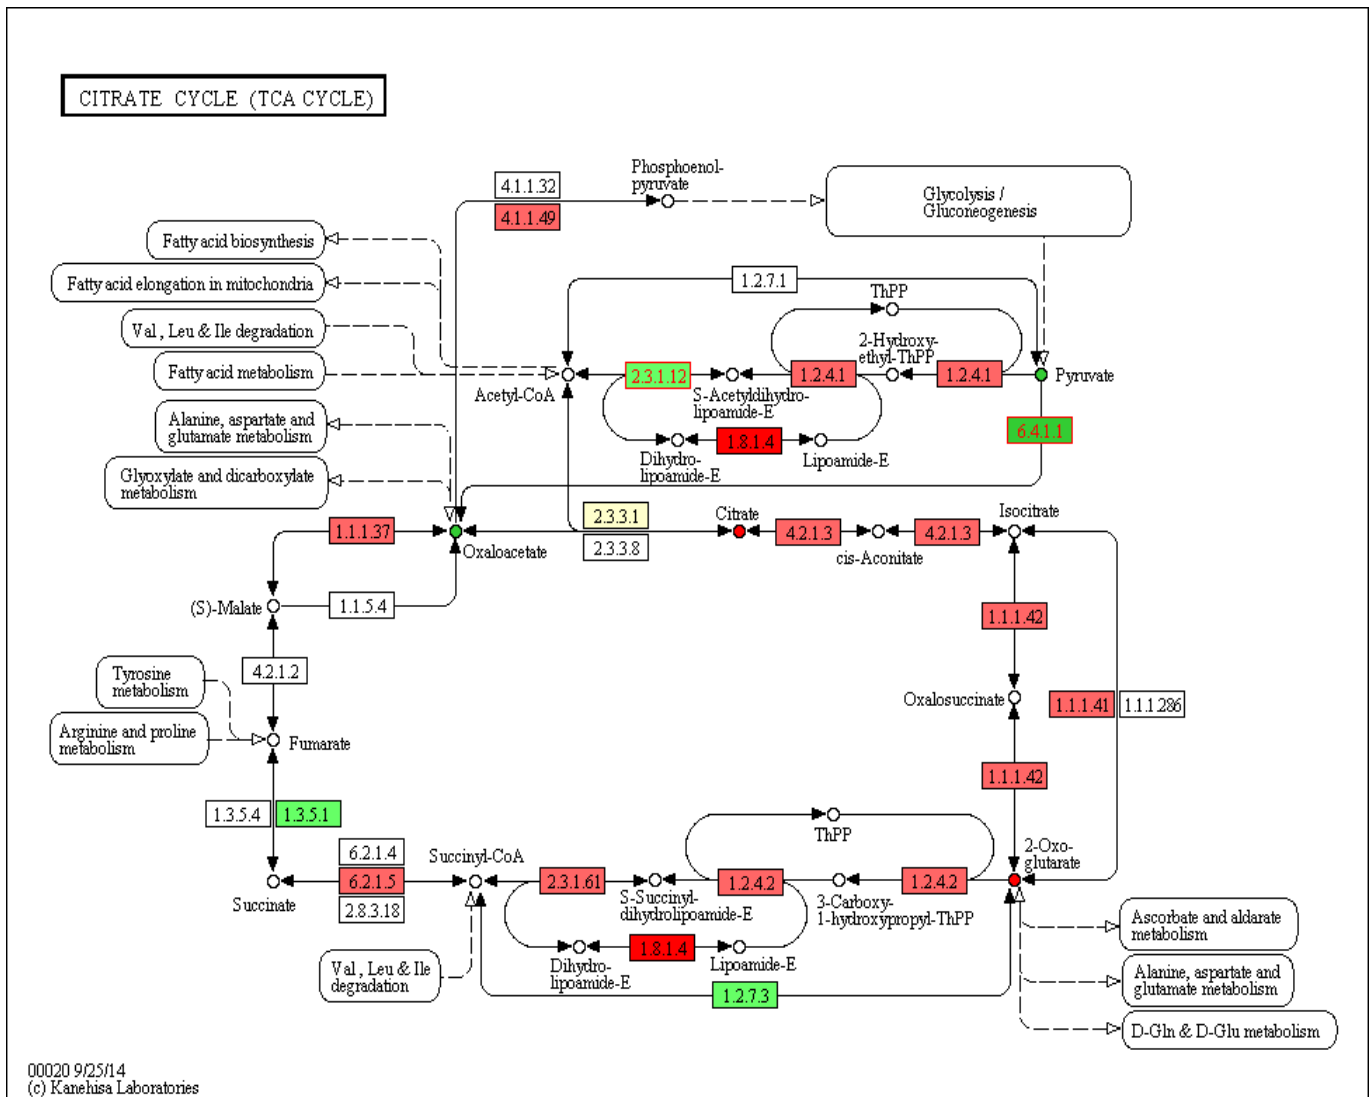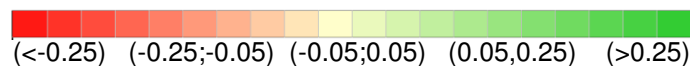

**Figure S6.** M31 citrate cycle (TCA cycle) KEGG map (sru:00020) showing the differential expression changes (log<sub>2</sub> fold change) of *S. ruber* M31 mean a percentage color gradient. The green boxes represent genes that increase their expression and the reds that decrease it. In red letters the genes that change its expression significantly (SRU\_828 = 6.4.1. 1; (SRU\_1969 = 2.3.1. 12). The circles show the increases (green) or decreases (red) of intermediate metabolites based on the genes expression levels that encode the enzymes that produce them.

**Table S1.** M8 (Gene ID SRM\_) and M31 (Gene ID SRU\_) genes with transcription below the detection threshold in pure culture. In blue, strain specific genes. In green, genes “untranscribed” both in M8 and M31. I: Island; CR: conserved region; HP: Hypothetical protein; CHP: Conserved hypothetical protein.

| GeneID    | Location | Function                | GeneID    | Location | Function                   |
|-----------|----------|-------------------------|-----------|----------|----------------------------|
| SRM_00004 |          | HP                      | SRM_00807 | I2       | HP                         |
| SRM_00141 |          | HP                      | SRM_00808 | I2       | HP                         |
| SRM_00142 |          | CHP                     | SRM_01218 |          | HP                         |
| SRM_00143 |          | HP                      | SRM_01405 |          | HP                         |
| SRM_00152 |          | HP                      | SRM_01571 |          | CHP                        |
| SRM_00202 |          | HP                      | SRM_01654 |          | HP                         |
| SRM_00204 |          | HP                      | SRM_01683 |          | HP                         |
| SRM_00239 | I1       | HP                      | SRM_01760 |          | CHP                        |
| SRM_00318 | I1       | HP                      | SRM_01835 |          | HP                         |
| SRM_00328 | I1       | HP                      | SRM_01949 |          | HP                         |
| SRM_00332 | I1       | HP                      | SRM_02101 |          | HP                         |
| SRM_00376 |          | HP                      | SRM_02231 |          | HP                         |
| SRM_00401 |          | HP                      | SRM_02302 | CR       | HP                         |
| SRM_00479 |          | HP                      | SRM_02491 | CR       |                            |
| SRM_00536 |          | HP                      | SRM_02677 |          | CHP                        |
| SRM_00670 |          | HP                      | SRM_02688 |          | HP                         |
| SRM_00686 | I2       | transposase             | SRM_02978 |          | HP                         |
| SRM_00756 | I2       | HP                      | PSR_56034 | PSR56    | HP                         |
| SRM_00765 | I2       | HP                      | PSR_61015 | PSR61    | HP                         |
| SRM_00775 | I2       | HP                      | PSR_61026 | PSR61    | HP                         |
| SRM_00784 | I2       | HP                      | PSR_61031 | PSR61    | HP                         |
| SRM_00799 | I2       | transposase             | PSR_84007 | PSR84    | HP                         |
| SRM_00875 |          | HP                      | PSR_84047 | PSR84    | HP                         |
| SRM_01016 |          | HP                      | PSR_84058 | PSR84    | HP                         |
| SRM_01047 |          | CHP                     | PSR_84061 | PSR84    | HP                         |
| SRM_01074 |          | HP                      | PSR_84063 | PSR84    | HP                         |
| SRM_01130 |          | HP                      | PSR_84067 | PSR84    | HP                         |
| SRM_01182 |          | HP                      |           |          |                            |
| SRU_0013  |          | HP                      | SRU_0863  | I3       | CHP                        |
| SRU_0125  |          | CHP                     | SRU_1104  | I3       | HP                         |
| SRU_0181  | I1       | HP                      | SRU_1107  | I3       | HP                         |
| SRU_0186  | I1       | HP                      | SRU_1376  |          | CHP                        |
| SRU_0187  | I1       | Transcription regulator | SRU_1406  |          | HP                         |
| SRU_0212  | I1       | CHP                     | SRU_1562  |          | CHP                        |
| SRU_0214  | I1       | CHP                     | SRU_1834  |          | HP                         |
| SRU_0215  | I1       | CHP                     | SRU_2021  | CR       | HP                         |
| SRU_0217  | I1       | HP                      | SRU_2339  |          | HP                         |
| SRU_0250  | I1       | HP                      | SRU_2394  |          | sensor kinase protein rcsC |

|          |    |    |           |                                 |
|----------|----|----|-----------|---------------------------------|
| SRU_0263 | I1 | HP | SRU_2457  | CHP                             |
| SRU_0284 |    | HP | SRU_2465  | HP                              |
| SRU_0578 |    | HP | SRU_2634  | HP                              |
| SRU_0593 | I2 | HP | SRU_2862  |                                 |
| SRU_0625 | I2 | HP | SRU_p0008 | tyrosine<br>recombinase<br>XerD |

---



**Table S2.** Genes with expression above 1000 RPKM (VHEG: “Very highly expressed genes”). Pink: M8 VHEG. Blue: M31 VHEG.

| Gene ID   | RPKM  | Annotation                                     | Location <sup>a</sup> | Ortholog.   |
|-----------|-------|------------------------------------------------|-----------------------|-------------|
| SRM_00001 | 27298 | hypothetical protein                           |                       | M8 specific |
| SRM_00036 | 1054  | 50S ribosomal protein L13                      |                       | SRU_0038    |
| SRM_00088 | 3787  | conserved hypothetical protein                 |                       | SRU_0081    |
| SRM_00272 | 2882  | hypothetical protein                           | I1                    | M8 specific |
| SRM_00392 | 1807  | hypothetical protein                           |                       | M8 specific |
| SRM_00393 | 1324  | cytochrome c oxidase subunit II                |                       | SRU_0313    |
| SRM_00452 | 2360  | hypothetical protein                           |                       | SRU_0375    |
| SRM_00460 | 7131  | AsnC family transcriptional regulator          |                       | SRU_0384    |
| SRM_00461 | 2700  | glutamine synthetase                           |                       | SRU_0385    |
| SRM_00512 | 2080  | hypothetical protein                           |                       | SRU_0435    |
| SRM_00590 | 1483  | TonB protein                                   |                       | SRU_0510    |
| SRM_00689 | 1216  | Chain length determinant protein               |                       | SRU_0594    |
| SRM_00690 | 1079  | Phage integrase family protein                 | I2                    | SRU_0595    |
| SRM_00691 | 1155  | UDP-glucose 6-dehydrogenase                    | I2                    | M8 specific |
| SRM_00692 | 2198  | hypothetical protein                           | I2                    | M8 specific |
| SRM_00700 | 1062  | acyl-[acyl-carrier-protein]--UDP-N-            | I2                    | SRU_0606    |
| SRM_00846 | 1205  | succinyl-CoA synthetase, alpha subunit         |                       | SRU_0670    |
| SRM_01098 | 1833  | PKD repeat protein                             |                       | SRU_0906    |
| SRM_01105 | 2142  | ATP synthase subunit C                         |                       | SRU_0912    |
| SRM_01159 | 7018  | cold-shock DNA-binding protein                 |                       | SRU_0966    |
| SRM_01223 | 2420  | hypothetical protein                           |                       | M8 specific |
| SRM_01230 | 1238  | 30S ribosomal protein S12                      |                       | SRU_1030    |
| SRM_01245 | 1502  | 30S ribosomal protein S17                      |                       | SRU_1044    |
| SRM_01262 | 1542  | 50S ribosomal protein L17                      |                       | SRU_1061    |
| SRM_01290 | 69145 | hypothetical protein                           |                       | M8 specific |
| SRM_01319 | 1005  | adenosylhomocysteinase                         |                       | SRU_1139    |
| SRM_01343 | 9430  | 50S ribosomal protein L31                      |                       | SRU_1162    |
| SRM_01355 | 4175  | 30S ribosomal protein S21                      |                       | M8 specific |
| SRM_01510 | 1188  | ATP-dependent Clp protease, ATPase subunit     |                       | SRU_1317    |
| SRM_01511 | 1071  | iron-sulfur cluster assembly accessory protein |                       | SRU_1318    |
| SRM_01611 | 3883  | 50S ribosomal protein L27                      |                       | SRU_1419    |
| SRM_01612 | 1525  | 50S ribosomal protein L21                      |                       | SRU_1420    |
| SRM_01670 | 1331  | Aconitate hydratase                            |                       | SRU_1477    |
| SRM_01698 | 1478  | Xanthorhodopsin                                |                       | SRU_1500    |
| SRM_01735 | 1026  | hypothetical protein                           |                       | SRU_1536    |
| SRM_01789 | 1569  | Azurin                                         |                       | SRU_1590    |
| SRM_01798 | 1716  | hypothetical protein                           |                       | M8 specific |
| SRM_01885 | 1032  | MotA/TolQ/ExbB proton channel                  |                       | SRU_1681    |
| SRM_01935 | 2210  | superoxide dismutase                           |                       | SRU_1724    |
| SRM_01939 | 1281  | cold-shock protein                             |                       | SRU_1727    |
| SRM_01942 | 10023 | hypothetical protein                           |                       | SRU_1731    |
| SRM_01970 | 1042  | DNA-directed RNA polymerase subunit beta'      |                       | SRU_1757    |
| SRM_01972 | 2596  | 50S ribosomal protein L7/L12                   |                       | SRU_1759    |
| SRM_01986 | 1308  | 30S ribosomal protein S15                      |                       | SRU_1774    |
| SRM_01995 | 1724  | conserved hypothetical protein                 |                       | SRU_1783    |
| SRM_01999 | 1629  | 30S ribosomal protein S1                       |                       | SRU_1787    |
| SRM_02130 | 1023  | hypothetical protein                           |                       | SRU_1919    |
| SRM_02344 | 4749  | 10 kDa chaperonin                              | CR                    | SRU_2121    |

|           |        |                                                                           |                     |              |
|-----------|--------|---------------------------------------------------------------------------|---------------------|--------------|
| SRM_02345 | 4666   | 60 kDa chaperonin                                                         | CR                  | SRU_2122     |
| SRM_02401 | 1006   | TonB-dependent receptor                                                   | CR                  | SRU_2178     |
| SRM_02404 | 2243   | hypothetical protein                                                      | CR                  | M8 specific  |
| SRM_02405 | 1219   | outer membrane protein                                                    | CR                  | SRU_2181     |
| SRM_02406 | 1789   | TonB-dependent receptor                                                   | CR                  | SRU_2182     |
| SRM_02434 | 4719   | peptidyl-prolyl cis-trans isomerase                                       | CR                  | SRU_2208     |
| SRM_02598 | 1960   | conserved hypothetical protein                                            |                     | SRU_2378     |
| SRM_02647 | 1123   | ATP synthase beta chain                                                   |                     | SRU_2429     |
| SRM_02648 | 1101   | ATP synthase subunit epsilon                                              |                     | SRU_2430     |
| SRM_02671 | 11771  | cold-shock protein                                                        |                     | SRU_2449     |
| SRM_02965 | 4151   | acyl carrier protein                                                      |                     | SRU_2754     |
| SRM_03020 | 2518   | 50S ribosomal protein L35                                                 |                     | SRU_2804     |
| SRM_03021 | 1592   | 50S ribosomal protein L20                                                 |                     | SRU_2805     |
| SRM_03022 | 1851   | hypothetical protein                                                      |                     | M8 specific  |
| SRM_03086 | 2065   | conserved hypothetical protein                                            |                     | SRU_2870     |
| PSR_11013 | 2937   | hypothetical protein containing Lambda repressor-like, DNA-binding domain | PSR11               | M8 specific  |
| M8ncRNA1  | 6616   | SAM (RF00162)SAM riboswitch (S box leader)                                | 688232pb-688349pb   | M31ncRNA1    |
| M8ncRNA2  | 378643 | TmRNA (RF00023) transfer-messenger RNA                                    | 1459257pb-1459625pb | M31ncRNA2    |
| M8ncRNA3  | 3611   | TPP (RF00059) TPP riboswitch (THI element)                                | 1510121pb-1510199pb | M31ncRNA3    |
| SRU_0021  | 1152   | ribosomal protein L28                                                     |                     | SRM_00022    |
| SRU_0081  | 3219   | conserved hypothetical protein                                            |                     | SRM_00088    |
| SRU_0237  | 1454   | chaperonin GroEL                                                          | I1                  | SRM_00297    |
| SRU_0313  | 1062   | cytochrome c oxidase subunit II                                           |                     | SRM_00393    |
| SRU_0375  | 1419   | hypothetical protein                                                      |                     | SRM_00452    |
| SRU_0384  | 8756   | putative AsnC-family transcriptional regulator                            |                     | SRM_00460    |
| SRU_0385  | 3098   | glutamine synthetase, type I                                              |                     | SRM_00461    |
| SRU_0394  | 1142   | NADH-quinone oxidoreductase chain b                                       |                     | SRM_00470    |
| SRU_0435  | 2151   | conserved hypothetical protein                                            |                     | SRM_00512    |
| SRU_0510  | 2083   | TonB                                                                      |                     | SRM_00590    |
| SRU_0594  | 1212   | Chain length determinant protein                                          | I2                  | SRM_00689    |
| SRU_0595  | 1144   | Phage integrase family protein                                            | I2                  | SRM_00690    |
| SRU_0596  | 1244   | UDP-glucose dehydrogenase                                                 | I2                  | M31 specific |
| SRU_0598  | 1001   | ABC transporter, multidrug efflux family                                  | I2                  | M31 specific |
| SRU_0599  | 1047   | NDP-sugar dehydrogenase, putative                                         | I2                  | SRM_00718    |
| SRU_0600  | 1095   | nucleoside-diphosphate-sugar epimerase                                    | I2                  | M31 specific |
| SRU_0601  | 1262   | perosamine synthetase , putative                                          | I2                  | SRM_00695    |
| SRU_0670  | 1428   | succinyl-CoA synthetase, alpha subunit                                    |                     | SRM_00846    |
| SRU_0729  | 1076   | bioY family protein                                                       |                     | SRM_00907    |
| SRU_0867  | 4175   | hypothetical protein                                                      |                     | SRM_01051    |
| SRU_0906  | 2304   | conserved protein                                                         |                     | SRM_01098    |
| SRU_0912  | 2494   | ATP synthase F0, C subunit                                                |                     | SRM_01105    |
| SRU_0966  | 12252  | 'Cold-shock' DNA-binding domain, putative                                 |                     | SRM_01159    |
| SRU_1035  | 1083   | ribosomal protein L3                                                      |                     | SRM_01236    |
| SRU_1044  | 1553   | 30S ribosomal protein S17                                                 |                     | SRM_01245    |
| SRU_1046  | 1015   | ribosomal protein L24                                                     |                     | SRM_01247    |
| SRU_1057  | 1014   | ribosomal protein S13p/S18e                                               |                     | SRM_01258    |
| SRU_1061  | 1125   | ribosomal protein L17                                                     |                     | SRM_01262    |
| SRU_1139  | 1094   | adenosylhomocysteinase                                                    |                     | SRM_01319    |
| SRU_1162  | 7278   | ribosomal protein L31                                                     |                     | SRM_01343    |
| SRU_1305  | 1080   | osmotically inducible protein C                                           |                     | SRM_01497    |

|           |        |                                                 |                         |              |
|-----------|--------|-------------------------------------------------|-------------------------|--------------|
| SRU_1317  | 1131   | ATP-dependent Clp protease, ATPase subunit      |                         | SRM_01510    |
| SRU_1318  | 1200   | iron-sulfur cluster assembly accessory protein, |                         | SRM_01511    |
| SRU_1367  | 1080   | ribosomal protein L9                            |                         | SRM_01562    |
| SRU_1419  | 3475   | ribosomal protein L27                           |                         | SRM_01611    |
| SRU_1477  | 1520   | aconitate hydratase, putative                   |                         | SRM_01670    |
| SRU_1500  | 1230   | xanthorhodopsin                                 |                         | SRM_01698    |
| SRU_1563  | 3368   | putative cold shock-like protein cspG           |                         | M31 specific |
| SRU_1590  | 1325   | auracyanin A precursor                          |                         | SRM_01789    |
| SRU_1681  | 1034   | MotA/TolQ/ExbB proton channel family protein    |                         | SRM_01885    |
| SRU_1724  | 1074   | Mn-superoxide dismutase                         |                         | SRM_01935    |
| SRU_1727  | 1576   | conserved domain protein                        |                         | SRM_01939    |
| SRU_1731  | 10618  | histone H1-like protein                         |                         | SRM_01942    |
| SRU_1757  | 1035   | DNA-directed RNA polymerase, beta' subunit      |                         | SRM_01970    |
| SRU_1759  | 2979   | ribosomal protein L7/L12                        |                         | SRM_01972    |
| SRU_1774  | 1318   | ribosomal protein S15                           |                         | SRM_01986    |
| SRU_1783  | 1336   | conserved hypothetical protein                  |                         | SRM_01995    |
| SRU_1787  | 1663   | ribosomal protein S1, putative                  |                         | SRM_01999    |
| SRU_1898  | 1069   | putative regulatory protein, FmdB family        |                         | SRM_02108    |
| SRU_1919  | 1048   | conserved hypothetical protein                  |                         | SRM_02130    |
| SRU_2121  | 3768   | chaperonin, 10 kDa                              | CR                      | SRM_02344    |
| SRU_2122  | 5605   | chaperonin GroEL                                | CR                      | SRM_02345    |
| SRU_2176  | 1270   | fasciclin domain protein                        | CR                      | SRM_02399    |
| SRU_2178  | 1425   | putative outer membrane protein, probably       | CR                      | SRM_02401    |
| SRU_2181  | 1898   | putative outer membrane protein probably        | CR                      | SRM_02405    |
| SRU_2182  | 2660   | putative outer membrane protein probably        | CR                      | SRM_02406    |
| SRU_2208  | 4404   | peptidyl-prolyl cis-trans isomerase, FKBP-type  | CR                      | SRM_02434    |
| SRU_2362  | 1518   | tetratricopeptide repeat domain protein         |                         | SRM_02581    |
| SRU_2378  | 1883   | conserved hypothetical protein                  |                         | SRM_02598    |
| SRU_2449  | 6566   | conserved domain protein                        |                         | SRM_02671    |
| SRU_2754  | 5634   | acyl carrier protein                            |                         | SRM_02965    |
| SRU_2781  | 1113   | oxidoreductase, putative                        |                         | SRM_02995    |
| SRU_2792  | 1389   | hypothetical HIT-like protein slr1234           |                         | SRM_03009    |
| SRU_2805  | 1626   | ribosomal protein L20                           |                         | SRM_03021    |
| SRU_2870  | 2096   | conserved hypothetical protein                  |                         | SRM_03086    |
| M31ncRNA1 | 19416  | SAM (RF00162)SAM riboswitch (S box leader)      | 648791pb-<br>648908pb   | M8ncRNA1     |
| M31ncRNA2 | 787545 | TmRNA (RF00023) transfer-messenger RNA          | 1401829pb-<br>1402196pb | M8ncRNA2     |
| M31ncRNA3 | 5095   | TPP (RF00059) TPP riboswitch (THI element)      | 1450683pb-<br>1450760pb | M8ncRNA3     |

<sup>a</sup>I: Island; CR: Conserved region

**Table S3.** Expression level differences between paralogous genes. 205 gene duplication events, 182 pre-M8/M31 divergence (1) and 23 post-M8/M31 divergence and detected in M8 strain (0), and genes involved are shown in the table. An average of Log2 fold change value was obtained in order to estimate expression level differences,  $1.31 \pm 1.26$  and  $2.5 \pm 2.13$  for duplication events accounted after (0; orange) and before (1; yellow) M8 and M31 strains divergence respectively.

| 1= Paralogs M8+M31<br>0= Paralogs M8 Strain specific | Gene ID                         | Absolute value<br>(log2Foldchange) |
|------------------------------------------------------|---------------------------------|------------------------------------|
| 1                                                    | SRM_00129                       | 0.0173                             |
| 0                                                    | SRM_00261; SRM_00259            | 0.0246                             |
| 1                                                    | SRM_02262                       | 0.0265                             |
| 1                                                    | SRM_02262; SRM_02974            | 0.0265                             |
| 0                                                    | SRM_00213; SRM_00270            | 0.0295                             |
| 0                                                    | SRM_00270; SRM_00213            | 0.0295                             |
| 1                                                    | SRM_02656                       | 0.1200                             |
| 1                                                    | SRM_01444                       | 0.1297                             |
| 1                                                    | SRM_02509                       | 0.1312                             |
| 1                                                    | SRM_02509                       | 0.1312                             |
| 0                                                    | SRM_00221; SRM_03003            | 0.1354                             |
| 0                                                    | SRM_0789; SRM_00832             | 0.1582                             |
| 1                                                    | SRM_00925                       | 0.1651                             |
| 1                                                    | SRM_00232; SRM_0077             | 0.1656                             |
| 1                                                    | SRM_01359; SRM_02708            | 0.1934                             |
| 1                                                    | SRM_00231; SRM_01776            | 0.2189                             |
| 1                                                    | SRM_00129; SRM_00342            | 0.2230                             |
| 1                                                    | SRM_00220                       | 0.2361                             |
| 1                                                    | SRM_01838; SRM_02731            | 0.2568                             |
| 1                                                    | SRM_01954; SRM_02906            | 0.2916                             |
| 0                                                    | SRM_00685; SRM_01408            | 0.2947                             |
| 1                                                    | SRM_00409; SRM_00553            | 0.2947                             |
| 1                                                    | SRM_01305; SRM_01306            | 0.2947                             |
| 1                                                    | SRM_00468; SRM_02549            | 0.2961                             |
| 1                                                    | SRM_00880; SRM_02030            | 0.3486                             |
| 0                                                    | SRM_00627; SRM_00832            | 0.3518                             |
| 1                                                    | SRM_00167; SRM_00961; SRM_01947 | 0.4449                             |
| 1                                                    | SRM_00301; SRM_02935            | 0.4604                             |
| 1                                                    | SRM_02733                       | 0.4798                             |
| 1                                                    | SRM_02733                       | 0.4798                             |
| 1                                                    | SRM_00322; SRM_01443; SRM_01749 | 0.4805                             |
| 0                                                    | SRM_00073; SRM_01073; SRM_02614 | 0.4852                             |
| 0                                                    | SRM_01073; SRM_00073; SRM_02614 | 0.4852                             |
| 1                                                    | SRM_02989                       | 0.4900                             |
| 1                                                    | SRM_00972; SRM_00973            | 0.4908                             |
| 1                                                    | SRM_02694                       | 0.5403                             |
| 1                                                    | SRM_01020; SRM_01422            | 0.5523                             |
| 1                                                    | SRM_00546; SRM_01101            | 0.5531                             |
| 0                                                    | SRM_01932; SRM_01930            | 0.5811                             |
| 1                                                    | SRM_00349; SRM_01219; SRM_01366 | 0.6070                             |

|   |                                                          |        |
|---|----------------------------------------------------------|--------|
| 1 | SRM_00235; SRM_00335                                     | 0.6449 |
| 1 | SRM_00080; SRM_00113; SRM_02547                          | 0.6449 |
| 1 | SRM_00322; SRM_01284; SRM_01749                          | 0.6612 |
| 1 | SRM_00305; SRM_02932                                     | 0.6868 |
| 1 | SRM_01666; SRM_01674                                     | 0.7007 |
| 1 | SRM_01159; SRM_02671                                     | 0.7460 |
| 1 | SRM_00221; SRM_01378; SRM_01407; SRM_03003               | 0.7826 |
| 1 | SRM_00221; SRM_00686; SRM_01378; SRM_01407;<br>SRM_03003 | 0.7826 |
| 1 | SRM_00118; SRM_01294                                     | 0.7942 |
| 0 | SRM_00286; SRM_00275                                     | 0.8155 |
| 1 | SRM_01450; SRM_01726                                     | 0.8844 |
| 1 | SRM_01450; SRM_01726                                     | 0.8844 |
| 1 | SRM_01036; SRM_01734                                     | 0.9243 |
| 1 | SRM_00200; SRM_01017                                     | 0.9311 |
| 1 | SRM_02695                                                | 0.9752 |
| 1 | SRM_03004                                                | 1.0121 |
| 1 | SRM_02402                                                | 1.0439 |
| 1 | SRM_01585; SRM_01586                                     | 1.0513 |
| 1 | SRM_00072; SRM_01075                                     | 1.0522 |
| 1 | SRM_00197; SRM_02947                                     | 1.0605 |
| 0 | SRM_00783; SRM_00736; SRM_00735                          | 1.0660 |
| 1 | SRM_00230; SRM_00243; SRM_00749                          | 1.0977 |
| 1 | SRM_01276; SRM_01961                                     | 1.0979 |
| 1 | SRM_01276; SRM_01961                                     | 1.0979 |
| 1 | SRM_01644                                                | 1.1098 |
| 1 | SRM_00383; SRM_00495                                     | 1.1269 |
| 1 | SRM_00370; SRM_00371                                     | 1.1521 |
| 1 | SRM_00181; SRM_00192                                     | 1.1870 |
| 1 | SRM_01264; SRM_01572                                     | 1.2349 |
| 0 | SRM_00736; SRM_00747; SRM_00831                          | 1.2580 |
| 1 | SRM_02736                                                | 1.3319 |
| 1 | SRM_01304; SRM_01645                                     | 1.3517 |
| 1 | SRM_01228; SRM_01782                                     | 1.4008 |
| 1 | SRM_00891; SRM_01320                                     | 1.4458 |
| 1 | SRM_00293; SRM_00477                                     | 1.4646 |
| 1 | SRM_00171                                                | 1.4947 |
| 1 | SRM_01506; SRM_02201; SRM_02206; SRM_02207               | 1.5955 |
| 1 | SRM_02650                                                | 1.6394 |
| 1 | SRM_02650                                                | 1.6394 |
| 1 | SRM_00164; SRM_02855                                     | 1.6482 |
| 1 | SRM_00224; SRM_02476;                                    | 1.6629 |
| 1 | SRM_00864; SRM_02102                                     | 1.6778 |
| 1 | SRM_00432; SRM_02241                                     | 1.7030 |
| 0 | SRM_00216; SRM_03002                                     | 1.7033 |
| 1 | SRM_00751; SRM_01491                                     | 1.7078 |
| 1 | SRM_00116                                                | 1.7090 |
| 1 | SRM_01208; SRM_01209                                     | 1.7429 |
| 1 | SRM_00159; SRM_00879                                     | 1.7819 |
| 1 | SRM_01838                                                | 1.8226 |
| 1 | SRM_00434; SRM_03056                                     | 1.8322 |
| 1 | SRM_02848                                                | 1.8333 |
| 1 | SRM_00185; SRM_02669                                     | 1.8806 |
| 1 | SRM_02300                                                | 1.9126 |
| 1 | SRM_00478; SRM_01071                                     | 1.9518 |

|   |                                                          |        |
|---|----------------------------------------------------------|--------|
| 1 | SRM_00885; SRM_02685                                     | 1.9663 |
| 1 | SRM_01455                                                | 1.9876 |
| 1 | SRM_00296; SRM_00627; SRM_00832; SRM_01317               | 2.0276 |
| 0 | SRM_00296; SRM_01317                                     | 2.0276 |
| 1 | SRM_00216; SRM_00685; SRM_01377; SRM_01408;<br>SRM_03002 | 2.0278 |
| 1 | SRM_00222; SRM_02478                                     | 2.0431 |
| 0 | SRM_02107; SRM_00794; SRM_00787; SRM_00795               | 2.0645 |
| 1 | SRM_00229; SRM_01775                                     | 2.2107 |
| 1 | SRM_00926; SRM_03073                                     | 2.2329 |
| 1 | SRM_00291; SRM_00820                                     | 2.4000 |
| 1 | SRM_00292; SRM_00551                                     | 2.4307 |
| 0 | SRM_02145; SRM_00817                                     | 2.4469 |
| 1 | SRM_00164                                                | 2.5168 |
| 1 | SRM_02263                                                | 2.5605 |
| 1 | SRM_01838                                                | 2.5605 |
| 1 | SRM_00200; SRM_01838                                     | 2.7033 |
| 1 | SRM_01338; SRM_02609                                     | 2.7342 |
| 1 | SRM_01338                                                | 2.7342 |
| 1 | SRM_02474                                                | 2.7413 |
| 1 | SRM_01667; SRM_02064                                     | 2.7550 |
| 1 | SRM_00798; SRM_02957                                     | 2.7897 |
| 1 | SRM_00435; SRM_01712                                     | 2.8115 |
| 1 | SRM_00335                                                | 2.8429 |
| 1 | SRM_00198                                                | 2.8754 |
| 1 | SRM_00351; SRM_02155                                     | 2.9545 |
| 1 | SRM_00351; SRM_02155                                     | 2.9545 |
| 1 | SRM_00792; SRM_00937; SRM_02135; SRM_02850;              | 2.9663 |
| 1 | SRM_00404; SRM_00415                                     | 2.9900 |
| 0 | SRM_0793; SRM_02851                                      | 3.0115 |
| 1 | SRM_00475; SRM_00844                                     | 3.0492 |
| 1 | SRM_02725                                                | 3.0605 |
| 1 | SRM_01954                                                | 3.1082 |
| 1 | SRM_00247; SRM_00716                                     | 3.1216 |
| 1 | SRM_00310; SRM_00929; SRM_01620                          | 3.1245 |
| 1 | SRM_01359                                                | 3.1476 |
| 1 | SRM_00094; SRM_00150; SRM_00169                          | 3.1561 |
| 1 | SRM_01336                                                | 3.2071 |
| 1 | SRM_00750; SRM_00810                                     | 3.2623 |
| 1 | SRM_02465                                                | 3.2815 |
| 1 | SRM_02171; SRM_02555; SRM_02579                          | 3.2990 |
| 1 | SRM_02171                                                | 3.2990 |
| 1 | SRM_02171                                                | 3.2990 |
| 0 | SRM_00251; SRM_00693                                     | 3.3166 |
| 0 | SRM_02410; SRM_00220                                     | 3.3362 |
| 1 | SRM_00745; SRM_00833                                     | 3.3386 |
| 1 | SRM_00383; SRM_02602                                     | 3.3647 |
| 1 | SRM_00819; SRM_02923                                     | 3.4656 |
| 1 | SRM_00223; SRM_02360; SRM_02477                          | 3.6470 |
| 1 | SRM_00165                                                | 3.6796 |
| 1 | SRM_01430                                                | 3.6986 |
| 1 | SRM_01464; SRM_01682                                     | 3.7152 |
| 1 | SRM_01464; SRM_01682                                     | 3.7152 |
| 1 | SRM_00547; SRM_02652                                     | 3.8041 |
| 1 | SRM_00356; SRM_01514                                     | 3.8456 |

|   |                                                                                                         |         |
|---|---------------------------------------------------------------------------------------------------------|---------|
| 1 | SRM_02061                                                                                               | 3.8536  |
| 1 | SRM_00435; SRM_00446                                                                                    | 3.8655  |
| 0 | SRM_00228; SRM_00733                                                                                    | 3.9360  |
| 1 | SRM_00093; SRM_01057; SRM_02263; SRM_02612                                                              | 3.9836  |
| 1 | SRM_00549; SRM_01015; SRM_02226                                                                         | 4.0012  |
| 1 | SRM_01014; SRM_01081; SRM_01091; SRM_01092                                                              | 4.0087  |
| 1 | SRM_00691; SRM_02917                                                                                    | 4.1720  |
|   | SRM_00167; SRM_00961; SRM_01947; SRM_00853;<br>SRM_00980; SRM_01507; SRM_01508; SRM_01948;<br>SRM_02204 | 4.3709  |
| 1 | SRM_00302                                                                                               | 4.4304  |
| 1 | SRM_00715; SRM_00802; SRM_00818                                                                         | 4.5593  |
| 1 | SRM_00561; SRM_01959                                                                                    | 4.9932  |
| 1 | SRM_00317; SRM_01325                                                                                    | 5.0824  |
| 1 | SRM_00316;                                                                                              | 5.1316  |
| 1 | SRM_00129; SRM_02127; SRM_02128                                                                         | 5.1368  |
| 1 | SRM_00340; SRM_01328                                                                                    | 5.3633  |
| 1 | SRM_00690; SRM_00735; SRM_00833;                                                                        | 5.3929  |
| 1 | SRM_00690; SRM_00735; SRM_00784                                                                         | 5.3929  |
| 1 | SRM_00186; SRM_00194                                                                                    | 5.8964  |
| 1 | SRM_00690; SRM_00735; SRM_00833                                                                         | 6.4589  |
|   | SRM_00101; SRM_00412; SRM_00433; SRM_00549;<br>SRM_01015; SRM_01017; SRM_02226                          | 6.5000  |
| 1 | SRM_00101                                                                                               | 6.5000  |
| 1 | SRM_00338; SRM_00590                                                                                    | 6.5267  |
| 1 | SRM_00101                                                                                               | 6.8795  |
| 1 | SRM_02403                                                                                               | 7.5403  |
| 1 | SRM_02435                                                                                               | 7.7904  |
| 1 | SRM_00161; SRM_01460                                                                                    | 7.8309  |
| 1 | SRM_00161; SRM_01460                                                                                    | 7.8309  |
| 1 | SRM_00315; SRM_01798                                                                                    | 7.9594  |
| 1 | SRM_00050; SRM_00285; SRM_01098; SRM_03074                                                              | 9.1698  |
| 1 | SRM_00088; SRM_00573                                                                                    | 9.9783  |
| 1 | SRM_00297                                                                                               | 10.1071 |
| 1 | SRM_02934                                                                                               |         |
| 1 | SRM_00381                                                                                               |         |
| 1 | SRM_00489                                                                                               |         |
| 1 | SRM_00503; SRM_00510; SRM_00511                                                                         |         |
| 1 | SRM_00221; SRM_00686; SRM_01378; SRM_01407                                                              |         |
| 1 | SRM_00765                                                                                               |         |
| 1 | SRM_00780                                                                                               |         |
| 1 | SRM_00781                                                                                               |         |
| 1 | SRM_00806                                                                                               |         |
| 1 | SRM_00809                                                                                               |         |
| 1 | SRM_01015                                                                                               |         |
| 1 | SRM_01195                                                                                               |         |
| 1 | SRM_01491                                                                                               |         |
| 1 | SRM_01506                                                                                               |         |
| 1 | SRM_02201                                                                                               |         |
| 1 |                                                                                                         |         |
| 1 | SRM_01682                                                                                               |         |
| 1 | SRM_01684                                                                                               |         |
| 1 | SRM_02092                                                                                               |         |
| 1 | SRM_02141                                                                                               |         |
| 1 |                                                                                                         |         |

|   |                      |
|---|----------------------|
| 1 |                      |
| 1 | SRM_02671            |
| 1 | SRM_02685            |
| 1 | SRM_02701            |
| 1 | SRM_02916            |
| 0 | SRM_00686; SRM_01407 |
| 0 | SRM_0784; SRM_00735  |

---
